# Supplementary material
Source: MDPI journal article supplement (https://www.mdpi.com/2073-4344/12/9/981)
Supplement: s1 [file s1]

# Solid-state Synthesis of ZnO/ZnS Photocatalyst with Efficient Organic Pollutant Degradation Performance

Xuekun Jin<sup>1</sup>, Jianjun Chen<sup>1,\*</sup>, Fengjuan Chen<sup>2,3,\*</sup>, Haiming Duan<sup>2</sup>, Ziyu Wang<sup>2</sup>,

Junhua Li<sup>1</sup>

<sup>1</sup>School of Environment, Tsinghua University, Beijing 100084, China.

<sup>2</sup>Key Laboratory of Solid State Physics and Devices Autonomous Region, School of Physics Science and Technology, Xinjiang University, Urumqi 830046, Xinjiang, P. R. China;

<sup>3</sup>Key Laboratory of Energy Materials Chemistry, Ministry of Education, Institute of Applied Chemistry, Xinjiang University, Urumqi, Xinjiang 830046, China.

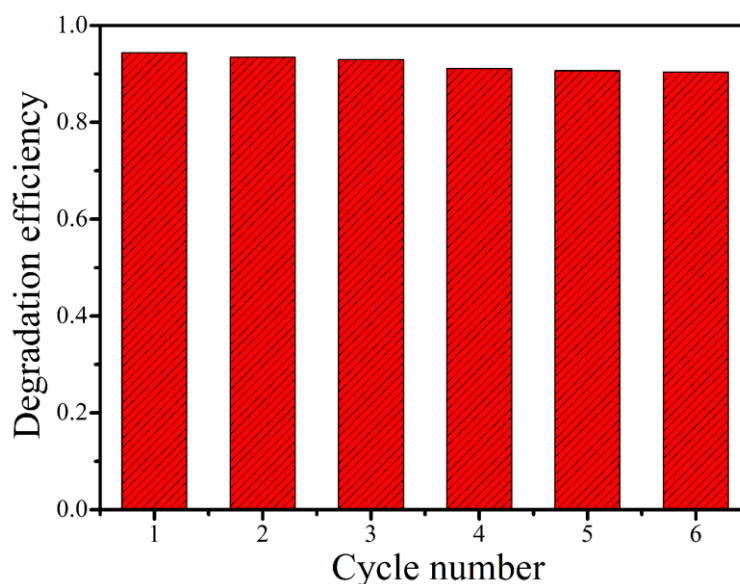

**Figure S1.** Cycling experiment of photocatalytic degradation of MO by ZOS-0.9 under UV light irradiation.
